# Supplementary material
Source: Springer Nature journal article supplement (https://www.springermedizin.de/resource/supplementary/13027_2012_411_MOESM3_ESM.pdf/25656942)
Supplement: MOESM3 [file 25656942]

### ASCUS

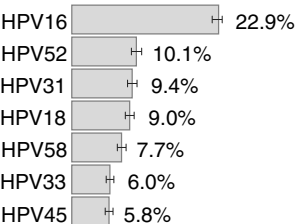

### CIN1

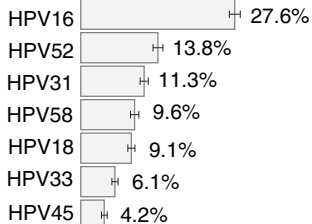

### LSIL

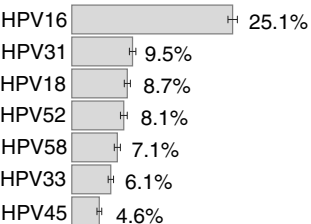

### CIN2

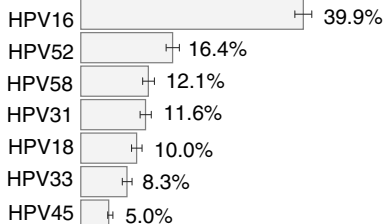

### HSIL

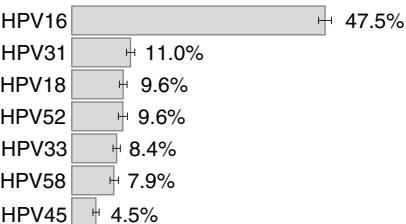

### CIN3

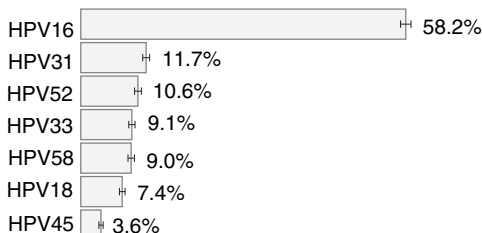

0 10 20 30 40 50 60

RC 95%CI

Graphs by cytological diagnosis

0 10 20 30 40 50 60

RC 95%CI

Graphs by histological diagnosis
